# Supplementary material for: Indirect Immobilised Jagged-1 Enhances Matrisome Proteins Associated with Osteogenic Differentiation of Human Dental Pulp Stem Cells: A Proteomic Study
Source: MDPI journal article supplement (doi:10.3390/ijms232213897), 2022-11-11
Supplement: s1 [file s1]

# Supplementary

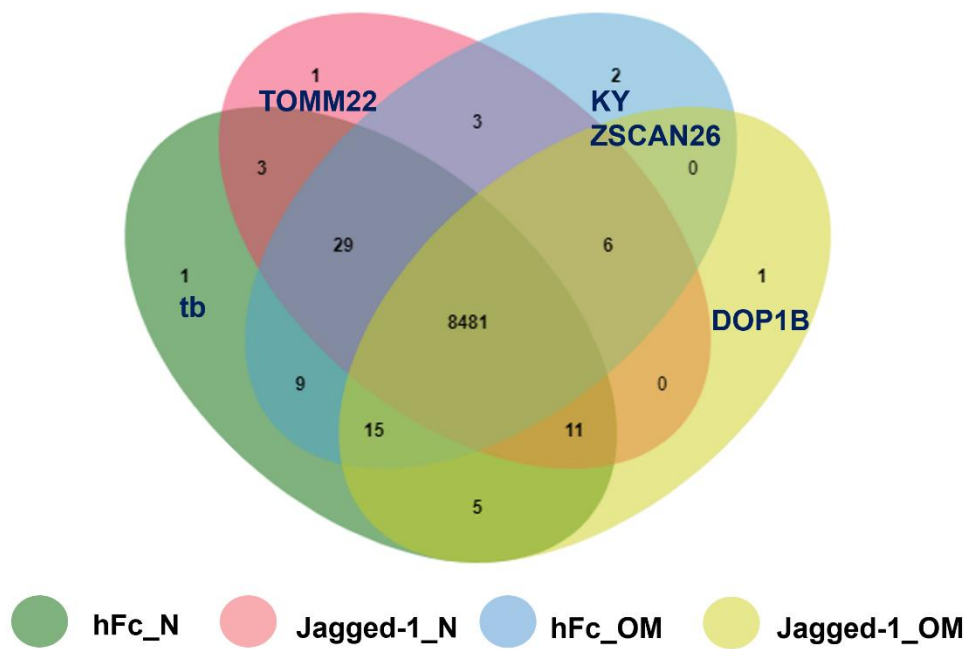

Figure S1. Venn diagram of the whole proteome classified by culture condition.

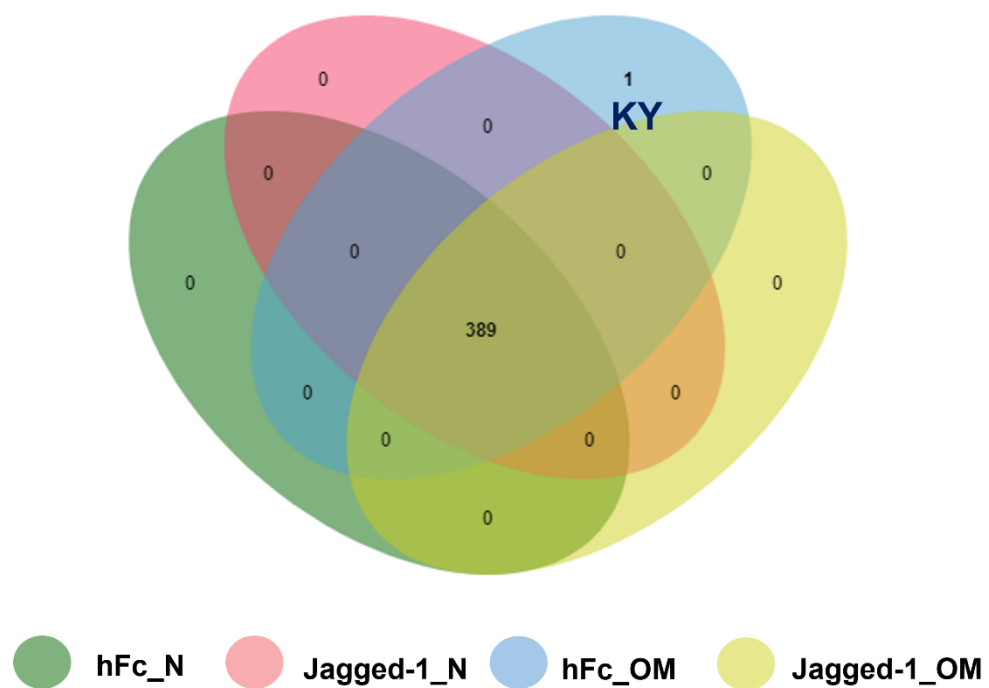

Figure S2. Venn diagram of the matrixome proteins in all cellular components separate by culture condition.
